## Index of Authors and Titles

BAGUÑA, J. *See* SALÓ, E.

BEAZLEY, L. D. *See* DUNLOP, S. A.

BROCKES, J. P. *See* KINTNER, C. R.

CHUNG, H-M. *See* NEFF, A. W.

CONLON, R. A. *See* KIDDER, G. M.

DALE, L., SMITH, J. C. *and* SLACK, J. M. W. Mesoderm induction in *Xenopus laevis*: a quantitative study using a cell lineage label and tissue-specific antibodies 289

DUNLOP, S. A. *and* BEAZLEY, L. D. Cell distributions in the retinal ganglion cell layer of adult Leptodactylid frogs after premetamorphic eye rotation 159

ERICKSON, R. P. *See* SÁNCHEZ, E. R.

EYAL-GILADI, H. *See* KHANER, O.

FLEMING, T. P. *and* PICKERING, S. J. Maturation and polarization of the endocytotic system in outside blastomeres during mouse preimplantation development 175

GAY, S. W. *and* KOSHER, R. A. Prostaglandin synthesis during the course of limb cartilage differentiation *in vitro* 367

GAZE, R. M. *See* TAYLOR, J. S. H.

HAMMERBERG, C. *See* SÁNCHEZ, E. R.

HOLDER, N. *See* WIGMORE, P.

INAGUMA, Y. *See* KIMATA, K.

INGHAM, P. W. A clonal analysis of the requirement for the *trithorax* gene in the diversification of segments in *Drosophila* 349

JEFFERY, W. R. Identification of proteins and mRNAs in isolated yellow crescents of ascidian eggs 275

JOHNSON, M. H. *See* SMITH, R. K. W.

KATO, M. *See* KIMATA, K.

KHANER, O., MITRANI, E. *and* EYAL-GILADI, H. Developmental potencies of area opaca and marginal zone areas of early chick blastoderms 235

KIDDER, G. M. *and* CONLON, R. A. Utilization of cytoplasmic poly(A)<sup>+</sup>RNA for protein synthesis in preimplantation mouse embryos 223

KIMATA, K., SAKAKURA, T., INAGUMA, Y., KATO, M. *and* NISHIZUKA, Y. Participation of two different mesenchymes in the developing mouse mammary gland: synthesis of basement membrane components by fat pad precursor cells 243

KINTNER, C. R. *and* BROCKES, J. P. Monoclonal antibodies to the cells of a regenerating limb 37

KOSHER, R. A. *See* GAY, S. W.

LAING, N. G. *and* LAMB, A. H. Muscle fibre types and innervation of the chick embryo limb following cervical spinal cord removal 209

LAMB, A. H. *See* LAING, N. G.

MAINI, P. K. *See* OSTER, G. F.

MALACINSKI, G. M. *See* NEFF, A. W.

- MALACINSKI, G. M. *See* MEULER, D. C.
- MEULER, D. C. *and* MALACINSKI, G. M. An analysis of protein synthesis patterns during early embryogenesis of the urodele – *Ambystoma mexicanum* 71
- MILLER, J. G. O. *and* SCHULTZ, G. A. Amino acid transport in mouse blastocyst compartments 149
- MITRANI, E. *See* KHANER, O.
- MURRAY, J. D. *See* OSTER, G. F.
- NEFF, A. W., MALACINSKI, G. M. *and* CHUNG, H-M. Microgravity simulation as a probe for understanding early *Xenopus* pattern specification 259
- NISHIZUKA, Y. *See* KIMATA, K.
- OSTER, G. F., MURRAY, J. D. *and* MAINI, P. K. A model for chondrogenic condensations in the developing limb: the role of extracellular matrix and cell tractions 93
- PICKERING, S. J. *See* FLEMING, T. P.
- SAKAKURA, T. *See* KIMATA, K.
- SALÓ E. *and* BAGUÑÀ, J. Cell movement in intact and regenerating planarians. Quantitation using chromosomal, nuclear and cytoplasmic markers 57
- SÁNCHEZ, E. R. *and* ERICKSON, R. P. Expression of the *Tcp-1* locus of the mouse during early embryogenesis 113
- SÁNCHEZ, E. R., HAMMERBERG, C. *and* ERICKSON, R. P. Quantitation of two-dimensional gel proteins reveals unequal amounts of *Tcp-1* gene products during mouse spermatogenesis but no correlation with transmission ratio distortion 123
- SCHULTZ, G. A. *See* MILLER, J. G. O.
- SLACK, J. M. W. *See* DALE, L.
- SMEDLEY, M. J. *and* STANISSTREET, M. Calcium and neurulation in mammalian embryos 1
- SMITH, J. C. *See* DALE, L.
- SMITH, L. J. Embryonic axis orientation in the mouse and its correlation with blastocyst relationships to the uterus. II. Relationships from 4½ to 9½ days 15
- SMITH, R. K. W. *and* JOHNSON, M. H. DNA replication and compaction in the cleaving embryo of the mouse 133
- STANISSTREET, M. *See* SMEDLEY, M. J.
- TAYLOR, J. S. H. *and* GAZE, R. M. The effects of the fibre environment on the paths taken by regenerating optic nerve fibres in *Xenopus* 383
- TOMLINSON, A. The cellular dynamics of pattern formation in the eye of *Drosophila* 313
- WIGMORE, P. *and* HOLDER, N. Regeneration from isolated half limbs in the upper arm of the axolotl 333
